# Supplementary material for: Land use change, management, and CO2 balance of second-crop corn in Brazil
Source: Research Square preprint supplement (doi:10.21203/rs.3.rs-7358018/v1), 2025-08-28
Supplement: Supplementary file 1 [file d6149cdd0d56d4f872512645.xlsx]

## Sheet: Yield_2nd_crop_corn
MILHO 2ª SAFRA - BRASIL
Série Histórica de Produtividade
Safras 1976/77 a 2024/25
Em kg/ha
REGIÃO/UF	1976/77	1977/78	1978/79	1979/80	1980/81	1981/82	1982/83	1983/84	1984/85	1985/86	1986/87	1987/88	1988/89	1989/90	1990/91	1991/92	1992/93	1993/94	1994/95	1995/96	1996/97	1997/98	1998/99	1999/00	2000/01	2001/02	2002/03	2003/04	2004/05	2005/06	2006/07	2007/08	2008/09	2009/10	2010/11	2011/12	2012/13	2013/14	2014/15	2015/16	2016/17	2017/18	2018/19	2019/20	2020/21	2021/22	2022/23	2023/24	2024/25 Previsão (¹)
NORTE	0	0	0	0	0	0	0	0	0	0	0	0	0	0	0	0	0	0	0	0	0	0	0	0	0	0	0	2789	2851	2489	3219.08	3450	3556	2656	3329	3849	4035.77	4182.74	4700.28	3815.8	4252.56	3850.34	4607.43	4776.82	4166.27	4507.94	4477.46	4708.96	4741.47
RR	0	0	0	0	0	0	0	0	0	0	0	0	0	0	0	0	0	0	0	0	0	0	0	0	0	0	0	0	0	0	0	0	0	0	0	0	0	0	0	3036	6000	4857	0	0	0	0	0	0	0
RO	0	0	0	0	0	0	0	0	0	0	0	0	0	0	0	0	0	0	0	0	0	0	0	0	0	0	0	2800	2800	2450	3234	3190	2950	2580	2631	3612	3728	3751	4613	4613	4385	4497	5034	5209	5190	5325.8	5281	5221	5332
AC	0	0	0	0	0	0	0	0	0	0	0	0	0	0	0	0	0	0	0	0	0	0	0	0	0	0	0	0	0	0	0			0			0	0	0	0	0	0	2050	2050	2600	4148	4237	4362	4249
AM	0	0	0	0	0	0	0	0	0	0	0	0	0	0	0	0	0	0	0	0	0	0	0	0	0	0	0	0	0	0	0			0			0	0	0	0	0	0	0	0
AP	0	0	0	0	0	0	0	0	0	0	0	0	0	0	0	0	0	0	0	0	0	0	0	0	0	0	0	0	0	0	0			0			0	0	0	0	0	0	933	0	0	0	0	0
PA	0	0	0	0	0	0	0	0	0	0	0	0	0	0	0	0	0	0	0	0	0	0	0	0	0	0	0	0	0	0	0			0			0	0	0	3072	3549	3403	3288	3357	3199	2960	3547	3761	3596
TO	0	0	0	0	0	0	0	0	0	0	0	0	0	0	0	0	0	0	0	0	0	0	0	0	0	0	0	2700	3600	3190	3190	4057	5450	3091	4691	4215	4710	4561	4768	3063	4402	3374	4917	5084	4105	4966	4522	5128	5241
NORDESTE	0	0	0	539.726	522.634	500	319.538	469.697	600	500	400	660.056	590.087	190.149	450.169	300	150	831.656	829.907	1119.16	760	613	800	840	430	820	800	734	1080	1235	1245	1415	1510	1852	2105	2141	3302.71	3591.77	2892.57	1015.46	2788.66	1188.01	1618.68	1920.1	1860.18	2171.37	2183.19	2026.77	2007.64
MA	0	0	0	0	0	0	0	0	0	0	0	0	0	0	0	0	0	0	0	0	0	0	0	0	0	0	0	0	0	0	0	0	0	0	0	2879	4214	3813	3867	1784	3572	2172	4184	5358	5358	5171	5198	4981	4824
PI	0	0	0	0	0	0	0	0	0	0	0	0	0	0	0	0	0	0	0	0	0	0	0	0	0	0	0	0	0	0	0	0	0	0	0	4311	3891	4998	4437	1756	2363	1289	4661	4567	3009	4973	4603	4089	4353
CE	0	0	0	0	0	0	0	0	0	0	0	0	0	0	0	0	0	0	0	0	0	0	0	0	0	0	0	0	0	0	0	0	0	0	0	0	0	0	0	0	0	0	792	1232	842	929	619	1132	1001
RN	0	0	0	0	0	0	0	0	0	0	0	0	0	0	0	0	0	0	0	0	0	0	0	0	0	0	0	0	0	0	0	0	0	0	0	0	0	0	0	0	0	0	645	574	523	485	550	342	549
PB	0	0	0	0	0	0	0	0	0	0	0	0	0	0	0	0	0	0	0	0	0	0	0	0	0	0	0	0	0	0	0	0	0	0	0	0	0	0	0	0	0	0	480	827	515	641	818	565	675
PE	0	0	0	0	0	0	0	0	0	0	0	0	0	0	0	0	0	0	0	0	0	0	0	0	0	0	0	0	0	0	0	0	0	0	0	0	0	0	0	0	654	600	470	800	450	490	738	886	641
AL	0	0	0	0	0	0	0	0	0	0	0	0	0	0	0	0	0	0	0	0	0	0	0	0	0	0	0	0	0	0	0	0	0	0	893	754	637	887	1007	674	674	1091	0	0	0	0	0
SE	0	0	0	0	0	0	0	0	0	0	0	0	0	0	0	0	0	0	0	0	0	0	0	0	0	0	0	0	0	0	0	0	0	0	4192	2629	4557	4670	3794	795	4721	808	0	0	0	0	0
BA	0	0	0	539.726	522.634	500	319.538	469.697	600	500	400	660.056	590.087	190.149	450	300	150	832	830	1119	760	613	800	840	430	820	800	734	1080	1235	1245	1415	1510	1852	1029	1250	2071	2630	1812	881	1918	875	0	0	4200	3000	3180	3460	3460
CENTRO-OESTE	0	0	0	0	0	0	0	0	0	0	0	0	0	1892.31	1700	1699.07	1358.02	1562.92	2012.88	1983.35	2520.89	2503	2019	2082	3041	2690	3816	3547	2845	3725	3484.29	3973	4046	4179	4002	5583	5610.67	5513.66	6059.57	3823.65	6008.41	5252.53	6135.88	6040.36	4777.58	5892.63	6582.08	6175.22	6345.56
MT	0	0	0	0	0	0	0	0	0	0	0	0	0	0	0	1500	1340	1800	2140	1850	2100	2150	1500	2100	2950	2720	3489	3420	3150	3900	3570	4237	5003	4047	3950	5680	5780	5457	6056	3999	6212	5860	6376	6392	5625	6338	6886	6902	6572
MS	0	0	0	0	0	0	0	0	0	0	0	0	0	1892.31	1700	1600	1300	985	1700	1800	2630	2450	2345	1695	2950	1957	4050	3421	1980	3300	3230	3255	2120	4050	3290	5100	5100	5140	5640	3679	5460	3685	5040	4700	2980	5669	5758	3746	5455
GO	0	0	0	0	0	0	0	0	0	0	0	0	0	0	0	2780	1575	2395	2500	2500	3100	3200	2400	2600	3400	3620	4200	4368	3525	4000	3765	4670	4569	4950	5400	6043	5744	6130	6578	3537	6000	5200	6720	6365	4100	4547	6382	6229	6538
DF	0	0	0	0	0	0	0	0	0	0	0	0	0	0	0	0	0	0	0	0	0	3393	2602	2210	3000	3000	4150	3800	4647	4891	3188	5635	5350	7304	6900	6000	9261	9000	9000	2400	7000	6500	7300	6880	4270	4620	5560	6000	6679
SUDESTE	0	0	0	0	0	0	0	0	0	0	0	0	1250	2195.38	2109.89	2110.17	2400	1470.05	2320.05	2100.08	1943.39	2851	2067	775	2393	1972	3273	3195	2448	2246	2673.45	3793	3584	3993	3311	4722	4537.81	4810.43	5212.02	2793.1	5081.05	3912.25	6089.78	5284.52	3251.25	4122.78	5500	4611.72	5233.89
MG	0	0	0	0	0	0	0	0	0	0	0	0	0	0	0	0	0	0	0	0	1620	2275	1740	1000	3000	3500	4100	3760	4000	3840	3280	5448	5677	5971	5726	5548	5200	5265	5505	2191	4822	4981	6982	6326	3974	3913	5500	4849	5397
ES	0	0	0	0	0	0	0	0	0	0	0	0	0	0	0	0	0	0	0	0	0	0	0	0	0	0	0	0	0	0	0	0	0	0	0	0	0	0	0	0	0	0	0	0				4532	4532
RJ	0	0	0	0	0	0	0	0	0	0	0	0	0	0	0	0	0	0	0	0	0	0	0	0	0	0	0	0	0	0	0	0	0	0	0	0	0	0	0	0	0	0	0	0				0
SP	0	0	0	0	0	0	0	0	0	0	0	0	1250	2195.38	2110	2110	2400	1470	2320	2100	1950	2900	2100	740	2350	1800	3200	3150	2320	2100	2600	3550	3345	3800	2900	4490	4300	4493	5010	3297	5274	3235	5330	4400	2600	4339	5500	4380	5086
SUL	0	0	0	0	0	0	0	1900	1900	1900	1900	1250	1250.2	1600	1579.83	2169.68	2056.75	1027.02	2400.63	2400	1400.03	2520	2600	1070	3100	1980	4080	3350	2211	3500	3470	3527	3024	4850	3610	5026	4834	5390	5840	5091	5456	4270	6004	5012	2591	4940	5942	4964	5483
PR	0	0	0	0	0	0	0	1900	1900	1900	1900	1250	1250.2	1600	1580	2165	2054	1020	2400	2400	1400	2520	2600	1070	3100	1980	4080	3350	2211	3500	3470	3527	3024	4850	3610	5026	4834	5390	5840	5091	5456	4270	6004	5012	2591	4940	5942	4964	5483
SC	0	0	0	0	0	0	0	0	0	0	0	0	0	0	0	2500	2500	2500	2500	0	0	0	0	0	0	0	0	0	0	0	0	0	0	0	0	0	0	0	0	0	0	0	0	0	0	0	0	0	0
RS	0	0	0	0	0	0	0	0	0	0	0	0	0	0	0	0	0	0	0	0	0	0	0	0	0	0	0	0	0	0	0	0	0	0	0	0	0	0	0	0	0	0	0	0	0	0	0	0	0
NORTE/NORDESTE	0	0	0	539.726	522.634	500	319.538	469.697	600	500	400	660.056	590.087	190.149	450.169	300	150	831.656	829.907	1119.16	760	613	800	840	430	820	800	848	1142	1292	1383.63	1600	1747	1989	2248	2454	3428.53	3706.43	3446.59	1870.64	3279.11	2120.43	2555.28	2885.24	2649.96	3045.02	3102.57	3187.91	3193.64
CENTRO-SUL	0	0	0	0	0	0	0	1900	1900	1900	1900	1250	1250.14	1758.28	1828.58	2072.34	2000.5	1312.72	2251.75	2169.8	1999.26	2581	2276	1409	2953	2309	3865	3434	2603	3501	3425.13	3810	3676	4355	3828	5369	5349.13	5437.77	5949.81	4023.13	5815.24	4942.28	6106.02	5787.29	4241.41	5575.19	6403.33	5857.86	6120.87
BRASIL	0	0	0	539.726	522.634	500	319.538	1173.85	1297.05	1108.7	1055.74	848.479	932.112	966.049	1320.04	1544.38	1870.76	1282.74	2069.31	2039.16	1825	2405	2100	1350	2661	2142	3592	3187	2419	3233	3239.02	3643	3540	4163	3641	5133	5187.71	5254.37	5715.91	3858.89	5564.44	4672.92	5682.37	5455.62	4049.55	5247.16	5953.99	5490.83	5705.57
Legenda: (¹) Estimativa em fevereiro/2025.
Fonte: Conab

## Sheet: dLUC+MP_ corn ethanol_BR
Anhydrous ethanol
LHV (MJ/kg)	28.26
Massa específica (t/m3)	0.791								2nd corn area (area) - BR	1.71128e+07					2nd corn area (area) - CO	1.21752e+07
Source: RenovaCalc: Matsuura et al. (2018)
Yield per ton of corn (Moreira et al. 2020)		LHV (MJ/kg) (RenovaCalc: Matsuura et al., 2018)	Moisture (%)
Ethanol (l/t)	430	22.3537	N/A
DDGS (kg/t)	363	20.2432	0.0872						Compartment and allocation method	dLUC, MP and Net emissions/removals from 2nd crop corn in Brazil (gCO2/ha)					Compartment and allocation method	dLUC, MP and Net emissions/removals from 2nd crop corn in CO (gCO2/ha)
Óleo (kg/t)	13	37.216	N/A							2003-2023	2013-2023					2003-2023	2013-2023
DDGS = distiller’s dried grains with soluble									dLUC emission- Energy Allocation	1.75529e+07	4.81028e+06			-0.725955	dLUC emission- Energy Allocation	1.6211e+07	3.4318e+06
									dLUC emission- Space-time Allocation	1.57213e+07	4.30833e+06			-0.725955	dLUC emission- Space-time Allocation	1.44245e+07	3.0536e+06
2nd crop corn Yield in Brazil(t.ha-1.year-1)		2nd crop corn Yield in CO (t.ha-1.year-1)							dLUC emission- Economic Allocation	1.27698e+07	3.49949e+06			-0.725955	dLUC emission- Economic Allocation	1.16104e+07	2.45787e+06
5.95399		6.58208							MP removal- Energy Allocation	-3.89522e+06	-2.8843e+06			-0.259529	MP removal- Energy Allocation	-3.73826e+06	-2.75141e+06
									MP removal- Space-time Allocation	-3.48876e+06	-2.58332e+06			-0.259529	MP removal- Space-time Allocation	-3.32629e+06	-2.4482e+06
									MP removal- Economic Allocation	-2.83378e+06	-2.09833e+06			-0.259529	MP removal- Economic Allocation	-2.67736e+06	-1.97058e+06
Ethanol and co-products - Brasil	1 ha	MJ em 1ha/ano		MJ.ha-1 in 10, 20 and 25 years					Net emission- Energy Allocation	1.36577e+07	1.92598e+06			-0.858982	Net emission- Energy Allocation	1.24727e+07	680383
			10	20	25	Fraction of energy allocation			Net emission- Space-time Allocation	1.22325e+07	1.72501e+06			-0.858982	Net emission- Space-time Allocation	1.10982e+07	605402
Ethanol (l)	2560.21	57230.2	572302	1.1446e+06	1.43075e+06	0.572032			Net removal- Economic Allocation	9.93599e+06	1.40116e+06			-0.858982	Net removal- Economic Allocation	8.93301e+06	487294
DDGS (kg)	2161.3	39936.4	399364	798728	998410	0.399176			* These data come from the spreadsheet "LUC_Corn2 emission factor" in Supplementary Material 2.
Óleo (kg)	77.4018	2880.59	28805.9	57611.7	72014.7	0.0287923
Total	NA	100047	1.00047e+06	2.00094e+06	2.50118e+06
									Brasil	gCO2/MJ (2003-2023)				Brasil	gCO2/MJ (2013-2023)				Centro Oeste	gCO2/MJ (2003-2023)				Centro Oeste	gCO2/MJ (2013-2023)
										10	20	25			10	20	25			10	20	25			10	20	25
Ethanol and co-products - Centro-Oeste	1 ha	MJ em 1ha/ano		MJ.ha-1 in 10, 20 and 25 years					dLUC emission- Energy Allocation	17.5446	8.77232	7.01785		dLUC emission- Energy Allocation	4.80802	2.40401	1.92321		dLUC emission- Energy Allocation	14.6571	7.32856	5.86285		dLUC emission- Energy Allocation	3.10286	1.55143	1.24114
			10	20	25	Fraction of energy allocation			dLUC emission- Space-time Allocation	15.7139	7.85694	6.28555		dLUC emission- Space-time Allocation	4.30631	2.15315	1.72252		dLUC emission- Space-time Allocation	13.0418	6.52092	5.21674		dLUC emission- Space-time Allocation	2.76091	1.38045	1.10436
Ethanol (l)	2830.3	63267.5	632675	1.26535e+06	1.58169e+06	0.572032			dLUC emission- Economic Allocation	12.7638	6.38188	5.1055		dLUC emission- Economic Allocation	3.49784	1.74892	1.39914		dLUC emission- Economic Allocation	10.4975	5.24875	4.199		dLUC emission- Economic Allocation	2.22228	1.11114	0.888912
DDGS (kg)	2389.3	44149.3	441493	882987	1.10373e+06	0.399176			MP removal- Energy Allocation	-3.89339	-1.94669	-1.55736		MP removal- Energy Allocation	-2.88294	-1.44147	-1.15318		MP removal- Energy Allocation	-3.37994	-1.68997	-1.35198		MP removal- Energy Allocation	-2.48769	-1.24384	-0.995075
Óleo (kg)	85.5671	3184.46	31844.6	63689.3	79611.6	0.0287923			MP removal- Space-time Allocation	-3.48712	-1.74356	-1.39485		MP removal- Space-time Allocation	-2.58211	-1.29105	-1.03284		MP removal- Space-time Allocation	-3.00746	-1.50373	-1.20298		MP removal- Space-time Allocation	-2.21353	-1.10677	-0.885414
			0	0	0				MP removal- Economic Allocation	-2.83245	-1.41622	-1.13298		MP removal- Economic Allocation	-2.09734	-1.04867	-0.838938		MP removal- Economic Allocation	-2.42073	-1.21037	-0.968292		MP removal- Economic Allocation	-1.78169	-0.890847	-0.712678
Total	NA	110601	1.10601e+06	2.21203e+06	2.76503e+06				dLUC+MP removal- Energy Allocation	13.6512	6.82562	5.4605		dLUC+MP removal- Energy Allocation	1.92508	0.962539	0.770031		dLUC+MP removal- Energy Allocation	11.2772	5.63859	4.51087		dLUC+MP removal- Energy Allocation	0.615168	0.307584	0.246067
									dLUC+MP removal- Space-time Allocation	12.2268	6.11338	4.8907		dLUC+MP removal- Space-time Allocation	1.7242	0.862099	0.689679		dLUC+MP removal- Space-time Allocation	10.0344	5.01719	4.01376		dLUC+MP removal- Space-time Allocation	0.547374	0.273687	0.21895
									dLUC+MP removal- Economic Allocation	9.93131	4.96566	3.97252		dLUC+MP removal- Economic Allocation	1.4005	0.700249	0.560199		dLUC+MP removal- Economic Allocation	8.07677	4.03838	3.23071		dLUC+MP removal- Economic Allocation	0.440586	0.220293	0.176234
									Compartment and allocation method	dLUC, MP and Net emissions/removals from 2nd crop corn ethanol in Brazil (gCO2/MJ)
										Amortization for the period dLUC		25-years amortization (CORSIA)
										2003-2023 (20 years)	2013-2023 (10 years)	2003-2023	2013-2023
									dLUC emission- Energy Allocation	8.77232	4.80802	7.01785	1.92321
									dLUC emission- Space-time Allocation	7.85694	4.30631	6.28555	1.72252
									dLUC emission- Economic Allocation	6.38188	3.49784	5.1055	1.39914
									MP removal- Energy Allocation	-1.94669	-2.88294	-1.55736	-1.15318
									MP removal- Space-time Allocation	-1.74356	-2.58211	-1.39485	-1.03284
									MP removal- Economic Allocation	-1.41622	-2.09734	-1.13298	-0.838938
									Net emission- Energy Allocation	6.82562	1.92508	5.4605	0.770031
									Net emission- Space-time Allocation	6.11338	1.7242	4.8907	0.689679
									Net emission- Economic Allocation	4.96566	1.4005	3.97252	0.560199
							Economic allocation		Compartment and allocation method	Emissions/removals from 2nd crop corn ethanol in Brazil (gCO2/MJ) - Economic allocation between co-products							Economic allocation		Compartment and allocation method	Emissions/removals from 2nd crop corn ethanol in Central West regionl (gCO2/MJ) - Economic allocation between co-products
										Amortization equal to the period		Amortization according to CORSIA (25 years)								Amortization equal to the period		25-year amortization
										2003-2023 (20 years)	2013-2023 (10 years)	2003-2023	2013-2023							2003-2023 (20 years)	2013-2023 (10 years)	2003-2023	2013-2023
									dLUC emission- Energy Allocation	6.79127	3.72223	5.43302	1.48889						dLUC emission- Energy Allocation	5.67356	2.40214	4.53885	0.960856
									dLUC emission- Space-time Allocation	6.08261	3.33382	4.86609	1.33353						dLUC emission- Space-time Allocation	5.04831	2.13742	4.03865	0.854966
									dLUC emission- Economic Allocation	4.94067	2.70793	3.95253	1.08317						dLUC emission- Economic Allocation	4.06343	1.72042	3.25074	0.68817
									MP removal- Energy Allocation	-1.50707	-2.23189	-1.20566	-0.892755						MP removal- Energy Allocation	-1.30833	-1.9259	-1.04666	-0.770358
									MP removal- Space-time Allocation	-1.34981	-1.99899	-1.07985	-0.799597						MP removal- Space-time Allocation	-1.16414	-1.71365	-0.931315	-0.685462
									MP removal- Economic Allocation	-1.0964	-1.6237	-0.877119	-0.649481						MP removal- Economic Allocation	-0.93703	-1.37934	-0.749624	-0.551734
									dLUC+MP emission- Energy Allocation	5.2842	1.49034	4.22736	0.596136						dLUC+MP emission- Energy Allocation	4.36523	0.476245	3.49219	0.190498
									dLUC+MP emission- Space-time Allocation	4.7328	1.33482	3.78624	0.533929						dLUC+MP emission- Space-time Allocation	3.88417	0.423761	3.10733	0.169504
									dLUC+MP emission- Economic Allocation	3.84427	1.08422	3.07541	0.43369						dLUC+MP emission- Economic Allocation	3.1264	0.341089	2.50112	0.136436
							Energy allocation		Compartment and allocation method	Emissions/removals from 2nd crop corn ethanol in Brazil (gCO2/MJ) - Energy allocation between co-products							Energy allocation		Compartment and allocation method	Emissions/removals from 2nd crop corn ethanol in Central West region (gCO2/MJ) - Energy allocation between co-products
										Amortization equal to the period		Amortization according to CORSIA (25 years)								Amortization equal to the period		25-year amortization
										2003-2023 (20 years)	2013-2023 (10 years)	2003-2023	2013-2023							2003-2023 (20 years)	2013-2023 (10 years)	2003-2023	2013-2023
									dLUC emission- Energy Allocation	5.01805	2.75034	4.01444	1.10014						dLUC emission- Energy Allocation	4.19217	1.77493	3.35374	0.709973
									dLUC emission- Space-time Allocation	4.49442	2.46334	3.59554	0.985338						dLUC emission- Space-time Allocation	3.73018	1.57933	2.98414	0.631731
									dLUC emission- Economic Allocation	3.65064	2.00088	2.92051	0.800351						dLUC emission- Economic Allocation	3.00245	1.27122	2.40196	0.508486
									MP removal- Energy Allocation	-1.11357	-1.64913	-0.890857	-0.659653						MP removal- Energy Allocation	-0.966717	-1.42304	-0.773374	-0.569215
									MP removal- Space-time Allocation	-0.997371	-1.47705	-0.797897	-0.590819						MP removal- Space-time Allocation	-0.860181	-1.26621	-0.688145	-0.506485
									MP removal- Economic Allocation	-0.810125	-1.19975	-0.6481	-0.479899						MP removal- Economic Allocation	-0.692368	-1.01919	-0.553894	-0.407674
									dLUC+MP emission- Energy Allocation	3.90448	1.10121	3.12358	0.440482						dLUC+MP emission- Energy Allocation	3.22545	0.351896	2.58036	0.140758
									dLUC+MP emission- Space-time Allocation	3.49705	0.986296	2.79764	0.394518						dLUC+MP emission- Space-time Allocation	2.87	0.313115	2.296	0.125246
									dLUC+MP emission- Economic Allocation	2.84051	0.801129	2.27241	0.320452						dLUC+MP emission- Economic Allocation	2.31008	0.252029	1.84807	0.100812
													-0.696841
							Economic allocation		Compartment and allocation method	Emissions/removals from 2nd crop corn ethanol (gCO2/MJ) - Economic allocation between co-products														https://etanoldemilho.com.br/dados-setoriais/
										Amortization equal to the period				Amortization according to CORSIA (25 years)										Milho moido para etanol (2022/23)	Milhoes de tonelada
										2003-2023 (20 years)		2013-2023 (10 years)		2003-2023		2013-2023								MT	7.33	0.741153
										BR	CO	BR	CO	BR	CO	BR	CO							MS	1.61	0.162791
									dLUC - Energy Allocation	6.79127	5.67356	3.72223	2.40214	5.43302	4.53885	1.48889	0.960856							GO	0.89	0.0899899
									dLUC - Space-time Allocation	6.08261	5.04831	3.33382	2.13742	4.86609	4.03865	1.33353	0.854966							Outros	0.06	0.00606673
									dLUC - Economic Allocation	4.94067	4.06343	2.70793	1.72042	3.95253	3.25074	1.08317	0.68817							Brasil	9.89	1
									MP - Energy Allocation	-1.50707	-1.30833	-2.23189	-1.9259	-1.20566	-1.04666	-0.892755	-0.770358
									MP - Space-time Allocation	-1.34981	-1.16414	-1.99899	-1.71365	-1.07985	-0.931315	-0.799597	-0.685462
									MP - Economic Allocation	-1.0964	-0.93703	-1.6237	-1.37934	-0.877119	-0.749624	-0.649481	-0.551734
									dLUC+MP - Energy Allocation	5.2842	4.36523	1.49034	0.476245	4.22736	3.49219	0.596136	0.190498
									dLUC+MP - Space-time Allocation	4.7328	3.88417	1.33482	0.423761	3.78624	3.10733	0.533929	0.169504
									dLUC+MP - Economic Allocation	3.84427	3.1264	1.08422	0.341089	3.07541	2.50112	0.43369	0.136436
							Energy allocation		Compartment and allocation method	Emissions/removals from 2nd crop corn ethanol (gCO2/MJ) - Energy allocation between co-products
										Amortization equal to the period				Amortization according to CORSIA (25 years)
										2003-2023 (20 years)		2013-2023 (10 years)		2003-2023		2013-2023
										BR	CO	BR	CO	BR	CO	BR	CO
									dLUC - Energy Alloc.	5.01805	4.19217	2.75034	1.77493	4.01444	3.35374	1.10014	0.709973
									dLUC - Space-time Alloc.	4.49442	3.73018	2.46334	1.57933	3.59554	2.98414	0.985338	0.631731
									dLUC - Economic Alloc.	3.65064	3.00245	2.00088	1.27122	2.92051	2.40196	0.800351	0.508486
									MP - Energy Alloc.	-1.11357	-0.966717	-1.64913	-1.42304	-0.890857	-0.773374	-0.659653	-0.569215
									MP - Space-time Alloc.	-0.997371	-0.860181	-1.47705	-1.26621	-0.797897	-0.688145	-0.590819	-0.506485
									MP - Economic Alloc.	-0.810125	-0.692368	-1.19975	-1.01919	-0.6481	-0.553894	-0.479899	-0.407674
									dLUC+MP - Energy Alloc.	3.90448	3.22545	1.10121	0.351896	3.12358	2.58036	0.440482	0.140758
									dLUC+MP - Space-time Alloc.	3.49705	2.87	0.986296	0.313115	2.79764	2.296	0.394518	0.125246
									dLUC+MP - Economic Alloc.	2.84051	2.31008	0.801129	0.252029	2.27241	1.84807	0.320452	0.100812

## Sheet: Economic_Allocation
	Moreira et al. (2020)														US$ million
														ethanol and co-products	428.2
														ethanol	317.5	0.774171	0.741476
														DDGS	84	0.19617	0.19617
														bioelectricity	14		0.032695	Fraction allocated to ethanol
														maize oil	12.7	0.029659	0.029659

## Sheet: References
References
Moreira, M. M. R.; Seabra, J. E. A., Lynd, L. R.; Arantes, S. M.; Cunha, M. P., Guilhoto; J. J. M. (2020). Socio-environmental and land-use impacts of double-cropped maize ethanol in Brazil. Nat Sustain 3, 209–216. https://doi.org/10.1038/s41893-019-0456-2.
M. I. S. Folegatti Matsuura; M. T. Scachetti; M. F. Chagas; J. E. A. Seabra; M. M. R. Moreira; A. M. Bonomi; G. Bayma; J. F. Picoli; M. A. B. Morandi; N. P. Ramos; O. Cavalett; R. M. L. Novaes. (2018). RenovaCalcMD: Método e ferramenta para a contabilidade da Intensidade de Carbono de Biocombustíveis no Programa RenovaBio . https://www.gov.br/anp/pt-br/assuntos/consultas-e-audiencias-publicas/con…
